# Supplementary material
Source: PubMed Central journal article supplement (PMC1298953)
Supplement: 5-7400036s1.pdf [file 5-7400036s1.pdf]

## Supplementary data

Sergi Castellano<sup>1</sup>, Sergey V. Novoselov<sup>2</sup>, Gregory V. Kryukov<sup>2</sup>,  
Alain Lescure<sup>3</sup>, Enrique Blanco<sup>1</sup>, Alain Krol<sup>3</sup>, Vadim N. Gladyshev<sup>2</sup> and Roderic Guigó<sup>1,4+</sup>

<sup>1</sup> Grup de Recerca en Informàtica Biomèdica. Institut Municipal d'Investigació Mèdica, Universitat Pompeu Fabra, Dr. Aiguader 80, 08003 Barcelona, Catalonia, Spain

<sup>2</sup> Department of Biochemistry, University of Nebraska, Lincoln NE 65588, USA

<sup>3</sup> Institut de Biologie Moléculaire et Cellulaire, 15 Rue René Descartes, 67084 Strasbourg Cedex, France

<sup>4</sup> Programa de Bioinformàtica i Genòmica, Centre de Regulació Genòmica, Barcelona, Catalonia, Spain

<sup>+</sup> Corresponding author. Tel: +34 93 224 0877; Fax: +34 93 224 0875; E-mail: rguigo@imim.es

## RESULTS

SECIS sequences are divided into standard structural units.

### ***Gallus gallus* (chicken) SECIS (TIGR ID: TC4619)**

CCUUUUGUGUCUG ACUGUAUUA UGAA AGGCUGGGUC UAAAAUCU GACGUACCCUGGAU GUUUU  
CAGUCAGAGACAGUCGG

### ***Danio rerio* (zebrafish) SECIS (TIGR ID: TC76454)**

GUGUUUAAUGGUGUGU GUAUUA UGAU AGUCUGACUC CAAACUCAGUGUAGAAAG AGCAGAUUUGAU  
GUCA ACACAUGCUUAUUAUAC

## METHODS

### Gene prediction

`geneid` is a program to predict protein coding genes in anonymous eukaryotic sequences designed with a hierarchical structure (see Parra *et al.* 2000, and the `geneid` documentation at <http://genome.imim.es/geneid> for details).

Basically, gene prediction involves three main steps:

- 1) prediction of sites.** That is, start (ATG), stop (TAA, TAG and TGA) and splice signals (GT and AG) that define potential exon boundaries. When predicting selenoproteins the TGA site is allowed two contrasting meanings, stop and selenocysteine codon (Castellano *et al.*, 2001). Position Specific Scoring Matrices are used to predict splice sites and start codons. Thus, predicted sites are scored as the log-likelihood ratio of the site sequence under the site model and under the random model.
- 2) prediction of coding exons.** `geneid` builds all possible exons compatible with the predicted sites and scores them according to the scores of the exon defining sites and to a coding potential function. The coding function reflects the species-specific bias in the usage of codons in protein coding regions. In `geneid`, a Markov Model of order five trained in known species-specific coding exons is used. These models have been typically applied to discriminate coding from non coding regions (Borodovsky and McIninch, 1993; Guigó, 1999).

We had previously shown that the region comprised between the in-frame TGA codon and the stop codon in selenoproteins bears the codon bias characteristic of protein coding regions, whereas the region comprised between the stop codon TGA, and the next stop codon in-frame in non-selenoproteins do not castellano: 2001a, as otherwise expected. Therefore, coding potential is in general much higher in selenoproteins than in non-selenoproteins in this region, and this value can be used to distinguish between actual selenoproteins and false positive predictions.

**3) assembly of genes.** From the set of predicted exons, `geneid` assembles the gene structure that maximizes the sum of the scores of the assembled exons. When assembling gene structures, `geneid` can take into account additional information about gene elements along the sequence. This information is provided externally, and may include previous knowledge about coding regions, or predictions obtained by other programs. It is in this way, that predicted SECIS elements can be introduced into gene predictions (Castellano *et al.*, 2001)

On the other hand, to be assembled into a gene structure, predicted exons and other genomic elements provided to `geneid` must conform to a number of user-defined biological constraints, such as frame compatibility, minimum and maximum distance between consecutive elements, and the order in which different genomic elements can be chained. All these rules are stated in the gene model, which is specified externally. When predicting selenoproteins the model may specify that predicted genes with TGA in-frame interrupted exons are only allowed when a suitable SECIS element has been predicted within a given range of nucleotides of the predicted gene stop codon (Castellano *et al.*, 2001).

### **Prediction of standard genes in the human and fugu genomes**

Gene structure prediction using `geneid` was done in the human and fugu genomes to predict standard genes.

#### **Human genome**

`geneid` was ran on the August 6, 2001 Golden Path assembly (release hg8) of the *Homo sapiens* genome (<http://genome.cse.ucsc.edu/>). 42357 genes were predicted.

#### **Fugu genome**

`geneid` was ran on the October 25, 2001 Joint Genome Institute (JGI, release 1.0) assembly of the *Takifugu rubripes* genome (<http://www.jgi.doe.gov/>). This initial assembly provides short contigs, but the gene compactness of the fugu genome makes gene prediction feasible. 41127 genes were predicted.

### **Prediction of selenoprotein genes in the human and fugu genomes**

As indicated above, we have modified slightly `geneid` in order to include the possibility of predicting selenoproteins. Essentially, the codon TGA can be understood both as stop and selenocysteine codon when building exons. Therefore, `geneid` is able to predict, at the same time, both standard genes and selenoprotein genes.

In contrast to the method presented in (Castellano *et al.*, 2001), where candidate selenoprotein genes were predicted only when a suitable SECIS prediction was present at the appropriate downstream distance, here we introduce a SECIS independent gene prediction approach. Potential selenoprotein gene candidates are predicted regardless of the presence of a downstream SECIS structure. Gene predictions interrupted by in-frame TGA codons, are likely to occur only when the strong coding bias characteristic of coding regions is present across the in-frame TGA codon. However, SECIS independent selenoprotein prediction results in an overwhelming number of selenoprotein candidates, due to the additional number of exons predicted (those that contain a TGA in-frame), which decrease accuracy of final gene structures. Consequently, in the approach presented here, a different biological constraint is used. A comparative protocol is followed, in such a way, that homology assessments at the protein level (see below) take place of SECIS restriction.

### **Known selenoproteins: human and fugu genomes**

Known selenoprotein genes were mapped in both, human and fugu genomes through BLAT (<http://genome.cse.ucsc.edu/>) and BLAST (Altschul *et al.*, 1997) searches.

23 known human selenoprotein genes belonging to 15 different families (known at that time) were mapped onto the human genome. The modified `geneid` version was used to predict them and sensitivity of the program was assessed. 20 out of 23 selenoprotein genes were properly predicted. Only SelK, SelT and SelS genes were not predicted as selenoproteins.

22 known fugu selenoprotein genes belonging to 14 different families were mapped onto the fugu genome (SelW gene was not found in this genome). The modified `geneid` version was used to predict them and

sensitivity of the program was assessed. 18 out of 22 selenoprotein genes were properly predicted. Only SelK, SelH, SelS and SelM genes were not predicted as selenoproteins.

In conclusion, 1) both genomes, as shown by the mapping of all but one fugu selenoprotein gene, are complete enough to run a gene prediction program on them; and 2) the modified `geneid` program is able to predict most selenoprotein genes without the SECIS constraint. Sensitivity (that is, predicting only as non-selenoprotein genes non-selenoprotein genes. Sn >80% in both genomes) is sufficient to make reasonable the prediction of novel selenoprotein genes in the human and fugu genomes.

In addition, the same seventeen (out of 22 common selenoprotein genes mapped on both genomes. Sn >75%) are properly predicted in the two genomes. This fact, makes also reasonable the assumption of, by means of a comparative approach between genomes, true selenoprotein genes can be pinpoint from false positive predictions.

### **Potential selenoproteins: human genome**

The modified version of `geneid` able to predict TGA in-frame genes was run on the August 25, 2001 Golden Path assembly of the *H. sapiens* genome. 27605 selenoprotein genes and 21603 standard genes were predicted. The modified version of `geneid` yields, in a single gene prediction, standard genes and potential TGA in-frame genes. This set of standard genes was discarded because gene structures are more reliably retrieved from standard `geneid` (see Prediction of standard genes in the human and fugu genomes) and selenoprotein gene prediction is intended only to provide genes bearing a TGA in-frame.

On the other hand, the set of potential selenoprotein genes is, in number, more than half of the total standard genes predicted by the standard `geneid` program. In other words, specificity (that is, predicting as selenoproteins only real selenoproteins) of the modified version of `geneid` able to predict TGA in-frame genes is extremely low at the level of sensitivity demanded (see above). Reasons for this are 1) coding potential, despite higher and positive in coding open reading frames (ORFs), can not discriminate as well when admitting a stop codon (TGA) in-frame. Many genes add short ORFs after a real stop codon (TGA), having that untranslated regio a low, but positive, coding potential; and 2) `geneid` parameters of the modified version, are slightly bias to include TGA in-frame exons. In this way, and because our aim

is finding novel selenoprotein families, we minimize the chance of missing yet unknown selenoproteins by overpredicting them. False positive predictions are removed at later stages (see below).

### **Potential selenoproteins: fugu genome**

A modified version of `geneid` able to predict TGA in-frame genes was run on the October 25, 2001 JGI assembly of the *T. rubripes* genome (<http://www.jgi.doe.gov/>). 28603 selenoprotein genes and 4523 standard genes were predicted. Same considerations, as for gene prediction in the human genome, apply to gene prediction in the fugu genome (see above).

### **Comparison of human and fugu standard protein and selenoprotein sets**

Selenoprotein families can have cysteine-homologs in the same or different genomes, but the Sec/Cys pattern for novel selenoproteins is unknown. Distribution of homologs can help to pinpoint selenoproteins and, in consequence, we introduced a protocol to predict and compare both types of genes.

Given human and fugu selenoprotein and standard gene complements we do the following set of intra and inter-genomic comparisons, at the protein level with `blastp` (query sequences were not filtered for low compositional complexity and a expectation value of  $1e-10$  was used. Stop codons in BLOSUM62 matrix were treated as cysteines), to reproduce possible Sec/Cys distribution patterns:

#### 1. Inter-genomic comparisons

- (a) Predicted human selenoproteins against predicted fugu selenoproteins (Sec/Sec)
- (b) Predicted human selenoproteins against predicted fugu standard genes (Sec/Cys)
- (c) Predicted fugu selenoproteins against predicted human standard genes (Sec/Cys)

#### 2. Intra-genomic comparisons

- (a) Predicted human selenoproteins against predicted human selenoproteins (Sec/Sec)
- (b) Predicted human selenoproteins against predicted human standard genes (Sec/Cys)
- (c) Predicted fugu selenoproteins against predicted fugu selenoproteins (Sec/Sec)
- (d) Predicted fugu selenoproteins against predicted fugu standard genes (Sec/Cys)

However, these two types of comparisons (inter and intra-genomic), are not processed in the same way. First and separately for each predicted human and fugu selenoprotein (27605 human and 28603 fugu proteins), all possible inter-genomic comparisons are computed to define potential selenoprotein pairs having selenocysteine in either human, fugu or, alternatively, in both genomes. The result is a collection (subset of initial human and fugu predicted selenoproteins) of individual human and fugu potential selenoproteins with orthology support. Some cases having only Sec-Sec support, some others having only Sec-Cys and the rest both of them. Second, and once putative ortholog pairs have already been selected, paralogy data, if exist, is included for each of them (previously calculated from intra-genomic comparisons). In this way, and because paralogy is not as informative as orthology (see below), potential selenoprotein orthologs between human and fugu define pairs of putative selenoprotein families, and paralogs add additional support to them.

The rationale behind this approach is that intra-genomic comparisons are false positive prone. Because of genome organization, where genes duplicate and may conserve sequence and gene structure, a false positive prediction in a genome (that is a gene with an incorrect TGA in-frame) may appear several times. Posterior comparisons would regard this gene as a potential selenoprotein family. However, this contingency is much more unlikely between genomes. The TGA (which is a false codon for Sec) may not be conserved and, at the same time, coding potential may be different (which can make that exon not to be included into predicted gene structure).

This procedure is consistent with the fact that human and fugu have all known selenoprotein families in Sec or Cys form. Therefore, we expect to predict a potential selenoprotein or cysteine homolog gene in both genomes and, at the same time, we use paralog information (too noisy by itself). Finally, human and fugu unique selenoproteins, that have been treated independently up to now, are collapsed when define the same human-fugu or fugu-human pair (that is, query and subject are the same but inverted).

Results were the following, 1) 368 human selenoprotein - fugu selenoprotein pairs (including 17 known human-fugu selenoprotein pairs); 2) 296 human selenoprotein - fugu cysteine homolog

pairs; and 3) 216 fugu selenoprotein - human cysteine homolog pairs. Note that Sec-Sec pairs may also have Sec-Cys homologs, though are included only in the Sec-Sec division.

### 3. Conservation around the selenocysteine amino acid

Selected ortholog pairs were further analyzed to assess protein sequence conservation around the selenocysteine amino acid. A block of 20 amino acids (10 at each side of the Sec residue aligned to either Sec or Cys) was checked for having at least 4 similar residues (according to BLOSUM62 matrix) on both parts. In order to gain sensitivity, when there were less than 10 residues on one, or both, sides the conservation assessment was skipped on that side(s). When applied, all known human and fugu selenoprotein pairs were recovered.

The results of this filtering step were the following, 1) 49 human selenoprotein - fugu selenoprotein pairs (including 17 known human-fugu selenoprotein pairs); 2) 58 human selenoprotein - fugu cysteine homolog pairs; and 3) 26 fugu selenoprotein - human cysteine homolog pairs.

### **Search for homologs**

In order to further validate the resulting human-fugu pairs, we undertook an exhaustive search against a number of databases of known coding sequences (proteins and ESTs) and several partial and full-length genomes. This approach should elicit real selenoprotein genes along with their Sec/Cys eukaryotic distribution. Each human and fugu selenoprotein member of potential pairs was studied.

### **International Protein Index**

The International Protein Index (IPI, human version 2.0) (<http://www.ebi.ac.uk/IPI/>) is a protein database that provides a minimally redundant yet maximally complete set of human genes and proteins. IPI is assembled from human protein sequence information taken from the following 5 data sources: 1) SWISS-PROT; 2) TrEMBL; 3) Ensembl (<http://www.ensembl.org>); 4) RefSeq NPs; and 5) RefSeq XPs. This database was used to discard sequences highly similar to known proteins with functions apparently unrelated to those of selenoproteins.

In this way, blast searches against the IPI database narrowed the number of potential pairs, that is containing unknown proteins, to 1) 21 human selenoprotein - fugu selenoprotein pairs (including 17 known human-fugu selenoprotein pairs); 2) 9 human selenoprotein - fugu cysteine homolog pairs; and 3) 2 fugu selenoprotein - human cysteine homolog pairs.

## **Genomes**

The following completely sequenced genomes from 1) *Drosophila melanogaster*; 2) *Caenorhabditis elegans*; 3) *Saccharomyces cerevisiae*; 4) *Schizosaccharomyces pombe*; 5) *Plasmodium falciparum*; and 6) *Arabidopsis thaliana* were queried by TBLASTN to identify sequences with homology in TGA-flanking region, containing either TGA (Sec codon) or TGT or TGC (Cys codons) in place of TGA. BLASTP searches against proteins annotated in these genomes were also carried out to identify cysteine-containing homologs. At the same time, partial sequenced genomes from 1) *Mus musculus*; 2) *Xenopus laevis*; 3) *Danio rerio*; 4) *Dictyostelium discoideum*; and 5) *Chlamydomonas reinhardtii* were also screened in the same way. These searches, allowed screening for new homolog sequences and reconstruction of Sec/Cys distribution across the eukaryotic lineage.

## **ESTs**

NCBI EST database (dbEST, build of April 15, 2002) was queried to 1) check consistency of human and fugu genomic sequence at the Sec/Cys region; and 2) search for novel homologs for members of the 14 potential selenoprotein pairs and 3) define Sec/Cys distribution across the eukaryotic lineage.

Blast searches against dbEST discarded pairs with either 1) predicted gene structure incompatible with the exonic structure of identical EST sequences; or 2) TGA selenocysteine codon not supported by corresponding EST sequences, therefore, presumably a genomic sequence error. This filtering step, apart from known human and fugu selenoproteins, resulted in two pairs containing both fugu selenoproteins and human cysteine homologs.

On the other hand, several Sec and Cys-containing SelU homologs were found (see below).

## **cDNAs**

The TIGR collection of transcripts (cDNAs and ESTs, <http://www.tigr.org>) was screened to search for SelU orthologs. In this way, a cysteine-containing homolog was found for zebrafish (*Danio rerio*, TC173888) and japanese medaka (*Oryzias latipes*, TC21944).

## **Paralogs**

The four sequences of the predicted two pairs, accounting for two fugu selenoproteins and two human cysteine homologs, were globally aligned with `clustalw` (Thompson *et al.*, 1994). Their alignment clearly showed that, on basis of sequence similarity, they belong to the same protein family. This fact reinforced the likelihood of them belonging to a real selenoprotein family.

On the other hand, further TBLASTN searches were done against the human and fugu genomes to unveil unpredicted paralogous sequences. BLASTP searches against annotated proteins in these genomes were also accomplished. An additional fugu selenoprotein member of the SelU family and a human cysteine-homolog belonging also to this family were found.

## **Search for prokaryotic homologs**

Fugu SelUa and human ENSG00000122378 proteins were blasted against 246 bacterial and 18 archaeal genomes available at NCBI ([http://www.ncbi.nlm.nih.gov/sutils/genom\\_table.cgi](http://www.ncbi.nlm.nih.gov/sutils/genom_table.cgi)). TBLASTN and BLASTP programs, against proteins from 177 annotated genomes, were used. No significant hits were found.

## **SelU distribution across the eukaryotic lineage**

Searches above yielded SelU homologs all across the eukaryotic lineage. They can be divided into (common name given when known):

Sec-containing homologs were found in:

**Fish:** fugu (*Takifugu rubripes*), zebrafish (*Danio rerio*), japanese medaka (*Oryzias latipes*), catfish (*I. punctatus*), rainbow trout (*Oncorhynchus mykiss*), carp (*Cyprinus carpio*), three spined stickleback (*Gasterosteus aculeatus*)

**Birds:** chicken (*Gallus gallus*)

**Echinoderms:** sea urchin (*Strongylocentrotus purpuratus*)

**Green algae:** *Chlamydomonas reinhardtii*

**Diatoms:** *Thalassiosira pseudonana*

Cys-containing homologs were found in:

**Mammals:** human (*Homo sapiens*), mouse (*Mus musculus*), rat (*Rattus norvegicus*), pig (*Sus scrofa*), cow (*Bos taurus*), dog (*Canis canis*), rabbit (*Oryctolagus cuniculus*).

**Fish:** fugu (*Takifugu rubripes*), zebrafish (*Danio rerio*), japanese medaka (*Oryzias latipes*)

**Amphibians:** frog (*Xenopus laevis*), frog (*Silurana tropicalis*)

**Tunicates:** *Ciona intestinalis*

**Arthropods** (insects): silkworm (*Bombix mori*)

**Nematodes:** *Caenorhabditis elegans*, *Caenorhabditis briggsae*, *Ancylostoma ceylanicum*, *Parastrongyloides trichosuri*, *Strongyloides stercoralis*, *Pristionchus pacificus*, *Toxocara canis*

Land plants: sweet orange (*Citrus sinensis*), barrel medic (*Medicago truncatula*), cabernet sauvignon (*Vitis vinifera*), sunflower (*Helianthus annuus*), barley (*Hordeum vulgare*), onion (*Allium cepa*), rape (*Brassica napus*), european aspen (*Populus tremula*), pepper (*Capsicum annuum*), sorghum (*Sorghum bicolor*)

**Green algae:** *Chlamydomonas reinhardtii*

**Slime molds:** *Dictyostelium discoideum*

Arg-containing homologs were found in:

**Nematodes:** *Strongyloides ratti*

No homologs were found in (complete genome sequence):

**Arthropods** (insects): fly (*Drosophila melanogaster*), mosquito (*Anopheles gambiae*)

**Yeast:** baker's yeast (*Saccharomyces cerevisiae*), fission's yeast (*Schizosaccharomyces pombe*)

**Apicomplexa:** malaria parasite (*Plasmodium falciparum*)

### **Prediction of protein secondary structure**

The crystal structure of an eukaryotic selenocysteine, the bovine glutathione peroxidase, has been resolved at 0.2 nm resolution (Epp *et al.*, 1983). The catalytic site of this enzyme is characterized by a beta-sheet—turn—alpha-helix structural motif, with the selenocysteine residue lying within the turn. Secondary structure predictions around the selenocysteine residue of most known selenoproteins, obtained using the program `Predator` (Frishman and Argos, 1997; Castellano *et al.*, 2001), essentially conformed to this structure (data not shown). Fugu SelU selenoproteins also stick to this pattern when predicted with the `Predator` program.

### **Prediction of SECIS elements**

SECIS elements were predicted in selected selenoprotein genes with the `SECISearch` program (Kryukov *et al.*, 2003). This program is available as a web server resource at <http://genome.unl.edu/SECISearch.html>. Given that predictions are only done in short genomic regions, false positive are not a concern, therefore a loose SECIS pattern can be used to permit identification of SECIS variants. The whole range of SECIS patterns provided by `SECISearch` were used. However, only canonical SECIS were found in *T.rubripes* (fugu, puffer fish), *D. rerio* (zebrafish) and *G.gallus* (chicken).

### **Search for fossil SECIS**

Annotated UTR regions were extracted from Ensembl ([www.ensembl.org](http://www.ensembl.org)) for human, mouse and rat SelU homologs. The IDs for the three sets of SelU orthologous genes are: 1) ENSG00000122378, ENSMUSG00000021792, ENSRNOG00000011140; 2) ENSG00000157870, ENSMUSG00000029059, ENSRNOG00000013468; 3) ENSG00000158122, ENSMUSG00000021482, ENSRNOG00000018886. However, most of these annotated UTRs were uncomplete. Possibly, because of the lack of EST sequences. In addition, UTR regions for SelU Cys-homologs from *Takifugu rubripes*, *Danio rerio*, *Oryzias latipes*, *Xenopus laevis*, *Ciona intestinalis*, *Caenorhabditis elegans*, *Caenorhabditis briggsae* and *Dictyostelium discoideum* were extracted from the TIGR collection of transcripts (cDNAs and ESTs, <http://www.tigr.org>) and, if needed, from the original genomic sequence.

In these UTR regions two analysis were performed:

1. Fish and chicken SECIS sequences were blasted against these UTRs in the search for similarity. No significant hits were found. However, while SECIS elements share a high degree of sequence identity among mammals (Kryukov *et al.*, 2003), this is not necessarily the case for functional and vestigial SECIS between, for example, fish, chicken and mammalian SECIS.
2. SECISearch was run on these UTRs with canonical and non-canonical patterns. No hits were found. Furthermore, the program PatScan (Dsouza *et al.*, 1997) was used to run even more degenerated patterns. However, matches were unclear. Specially, because no similar hits were found between human and rodent UTRs.

In any case, the lack of a potential fossil SECIS does not yet discard the hypothesis of a Sec to Cys mutation, because the UTRs under study could have accumulated enough mutations to fade the SECIS phylogenetic signal.

In addition, SECIS similarity searches were run on the whole TIGR collection of transcripts (cDNAs and ESTs, <http://www.tigr.org>). The rational behind this was, again, to find vestigial SECIS elements through sequence similarity. In the hope that they are still recognizable, that is, change from Sec to Cys is either quite recent or the mutation rate is low enough, we could expect still some phylogenetic footprint. However, because even functional SECIS diverge, a negative result is likely and, at the same time, inconclusive respect to clarify evolutionary events. Searches were done on the Eukaryotic Gene Ortholog (EGO) database at TIGR. It is a collection of partial and full length cDNAs from 61 different eukaryotic organisms. Again, results were not convincing.

## References

Altschul, S. F., Madden, T., Schaffer, A., Zhang, J., Zhang, Z., Miller, W., and Lipman, D. (1997) Gapped BLAST and PSI-BLAST: a new generation of protein database search programs. *Nucleic Acids Research*, **25**, 3389–3402.

Borodovsky, M. and McIninch J. (1993) GenMark: Parallel gene recognition for both DNA strands. *Computer and Chemistry*, **17**, 123-134.

Castellano, S., Morozova, N., Morey, M., Berry, M. J., Serras, F., Corominas, M., and Guigó, R. (2001) *in silico* identification of novel selenoproteins in the *Drosophila melanogaster* genome. *EMBO reports*, **2**, 697–702.

Dsouza, M., Larsen, N. and Overweek, R. (1997) Searching for patterns in genomic data. *Trends Genet.*, **13**, 497-498.

Epp, O., Ladenstein, R., and Wendel, A. (1983) The refined structures of the selenoenzyme glutathione peroxidase at 0.2-nm resolution. *Eur. J. Biochem.*, **133**, 51.

Frishman, D. and Argos, P. (1997) Seventy-five percent accuracy in protein secondary structure prediction. *Proteins*, **27**, 329–335.

Guigó, R. (1999) DNA composition, codon usage and exon prediction. In Bishop, M., editor, *Genetic Databases*, pages 53–80. Academic Press, San Diego, California.

Kryukov, G.V., Castellano, S., Novoselov, S.V., Lobanov, A.V., Zehrab, O., Guigó, R. and Gladyshev V.N. (2003) Characterization of Mammalian Selenoproteomes. *Science*, **300**, 1439-1443.

Parra, G., Blanco, E., and Guigó, R. (2000) Geneid in *Drosophila*. *Genome Research*, **10**, 511–515.

Thompson, J., Higgins, D., and Gibson, T. (1994) CLUSTAL\_W: improving the sensitivity of progressive sequence alignment through sequence weighting, position-specific gap penalties and weight matrix choice. *Nucleic. Acids Res.*, **22**, 4673–4680.
